# Supplementary material for: Characterization of Pik1 function in fission yeast reveals its conserved role in lipid synthesis and not cytokinesis
Source: PubMed Central journal article supplement (PMC10629694; doi:10.1242/jcs.261415), 2023-11-01
Supplement: joces-136-261415-s1.pdf [file joces-136-261415-s1.pdf]

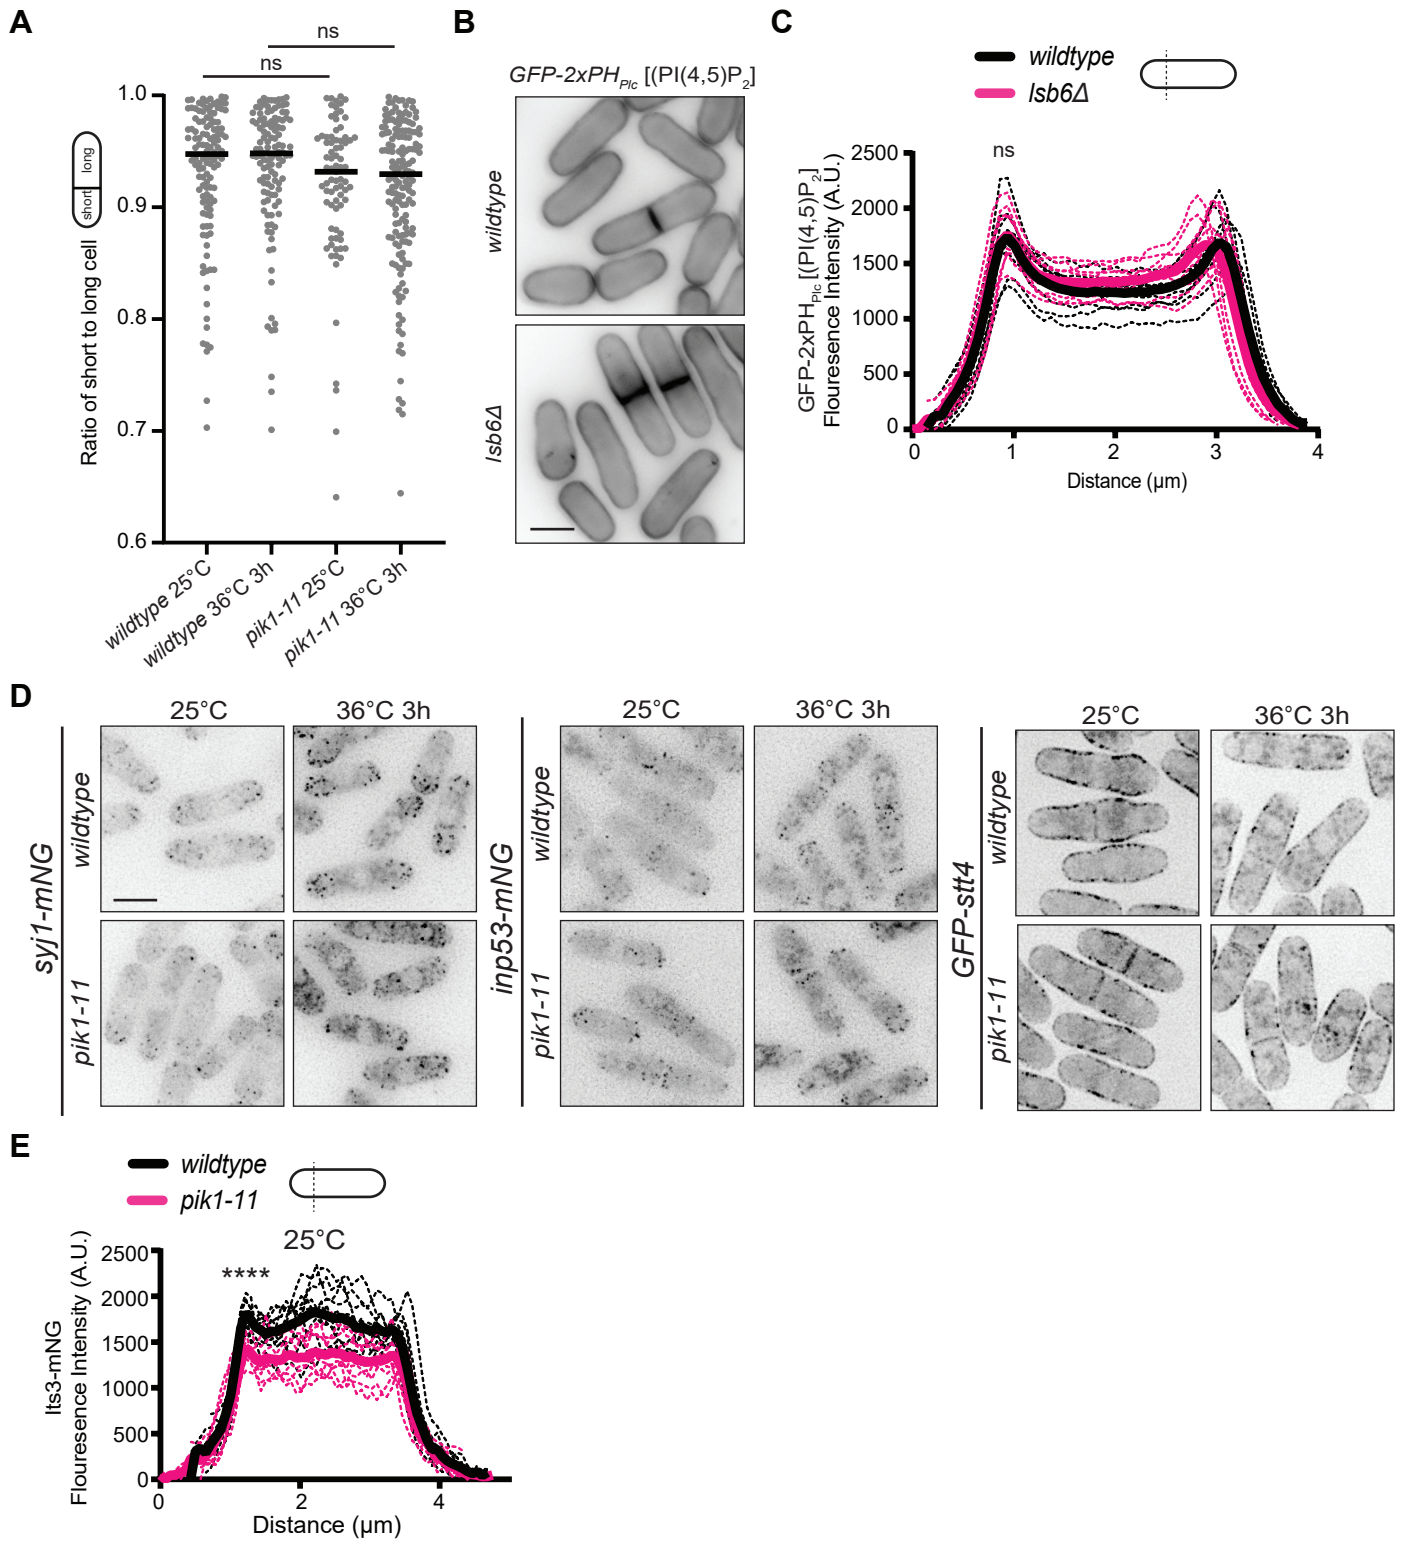

**Fig. S1. *Isb6Δ* cells do not have reduced PI(4,5)P<sub>2</sub>.** A) Quantification of septum placement from DIC images of the indicated strains at the indicated temperatures. *wildtype* 25°C vs *pik1-11* 25°C,  $P = 0.558$ ; *wildtype* 36°C vs *pik1-11* 36°C,  $P = 0.106$ . One-way ANOVA. Data is from two biological replicates and  $n \geq 79$  for each. B) Live-cell images of GFP-2xPH<sub>Plc</sub> in *wildtype* and *Isb6Δ* cells. Cells were grown at 25°C in YE. C, E) Line scans of fluorescence intensity drawn across the short axis of 10 cells for each indicated strain at the indicated temperature. Solid lines represent the mean and dotted lines are the individual line scans. Data is from two biological replicates. For C, *wildtype* vs. *Isb6Δ* at first peak, .93 μm distance,  $P = 0.83$ . For E, *wildtype* vs. *pik1-11* at first peak, 1.22 μm distance,  $P < 0.0001$ . \*\*\*\*  $P \leq .0001$ , Student's *t*-test. D) Live-cell images of Syj1-mNG, Inp53-mNG or GFP-Stt4 in *wildtype* and *pik1-11* cells. Cells were grown at 25°C and shifted to 36°C for 3 hours and imaged at both time points. Scale bars, 5 μm.

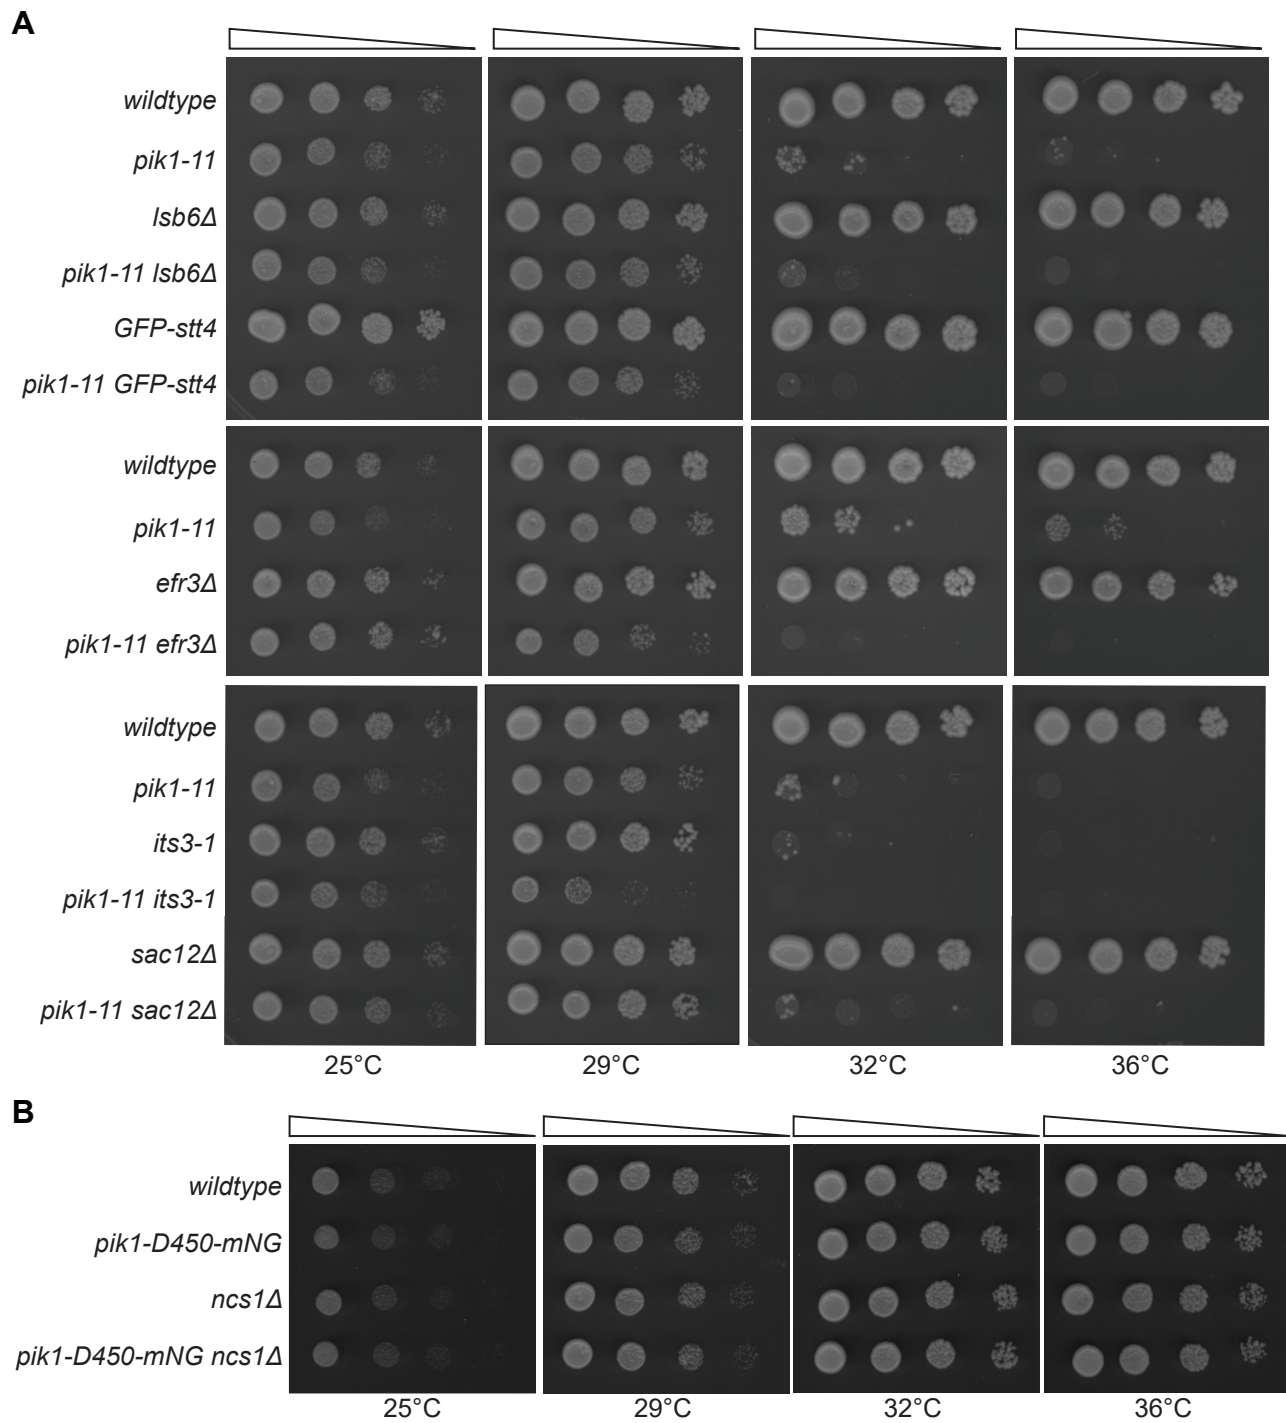

**Fig. S2. Genetic analysis of *pik1-11*.** A-B) 10-fold serial dilutions of the indicated strains grown at the indicated temperatures on YE agar for 3-4 days.

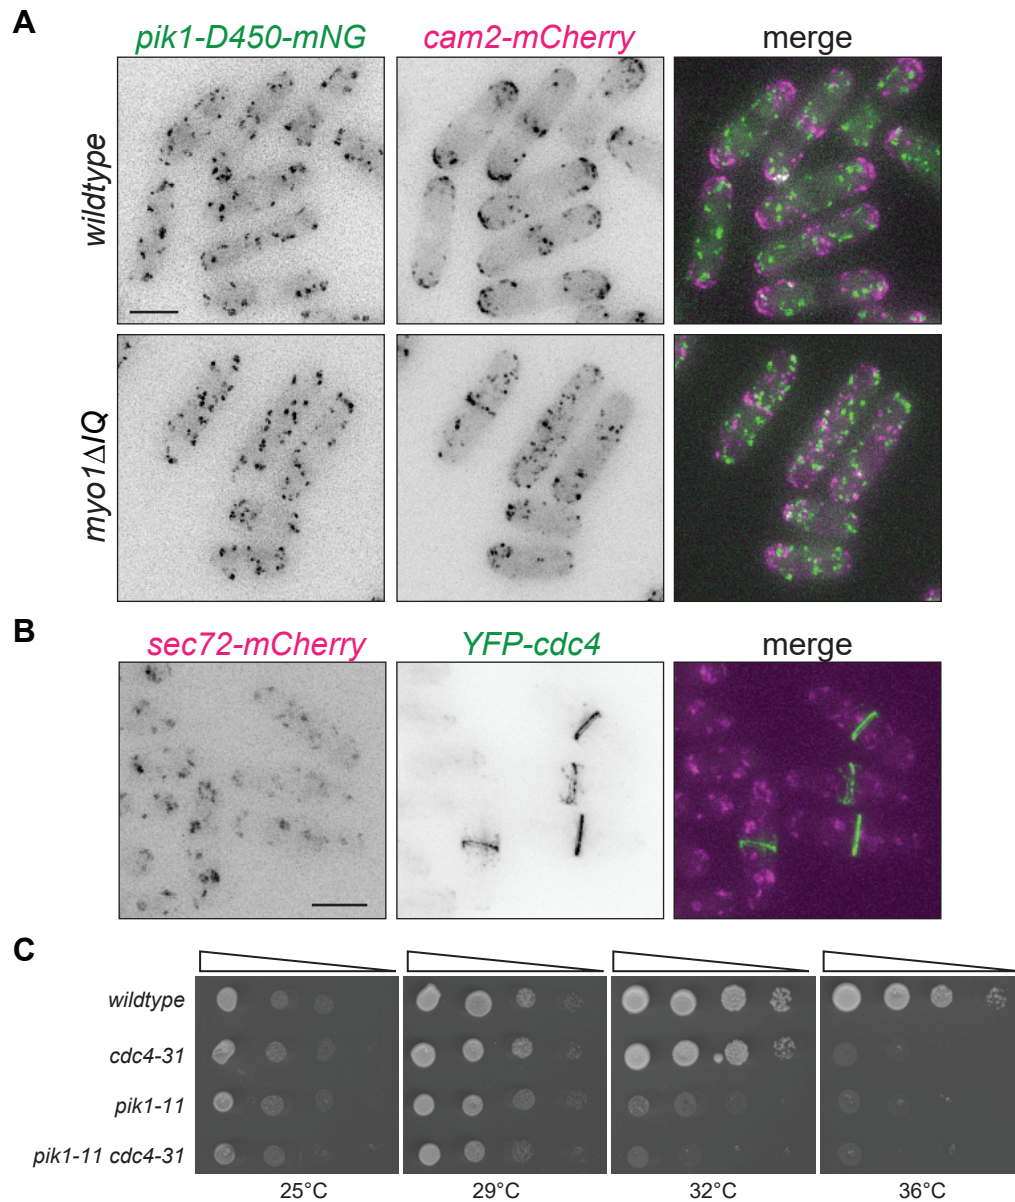

**Fig. S3. Cam2 and Cdc4 do not colocalize with Pik1.** A-B) Live-cell imaging of the indicated strains. Scale bars, 5  $\mu$ m. C) 10-fold serial dilutions of the indicated strains grown at the indicated temperatures on YE agar for 3-4 days.

**Table S1. *S. pombe* strains used in this study**

| Strain           | Genotype                                                                                                               | Source     |
|------------------|------------------------------------------------------------------------------------------------------------------------|------------|
| <b>Figure 1</b>  |                                                                                                                        |            |
| KGY246           | <i>ade6-M210 ura4-D18 leu1-32 h<sup>-</sup></i>                                                                        | Lab stock  |
| KGY7427-2        | <i>pik1-11:kanMX6 ade6-M21X ura4-D18 leu1-32 h<sup>-</sup></i>                                                         | This study |
| <b>Figure 2</b>  |                                                                                                                        |            |
| KGY19217         | <i>GFP-P4C<sub>Sidc</sub>:leu1<sup>+</sup> ade6-M210 leu1-32 ura4-D18 h<sup>+</sup></i>                                | Lab stock  |
| KGY7593-2        | <i>pik1-11:kanMX6 GFP-P4C<sub>Sidc</sub>:leu1<sup>+</sup> ade6-M210 leu1-32 ura4-D18 h<sup>+</sup></i>                 | This study |
| KGY269-2         | <i>GFP-2xPH<sub>Plc</sub>:leu1<sup>+</sup> ade6-M210 leu1-32 ura4-D18 h<sup>+</sup></i>                                | Lab stock  |
| KGY7596-2        | <i>pik1-11:kanMX6 GFP-2xPH<sub>Plc</sub>:leu1<sup>+</sup> ade6-M210 leu1-32 ura4-D18 h<sup>+</sup></i>                 | This study |
| KGY243-2         | <i>its3-mNG:hphMX6 ade6-M210 leu1-32 ura4-D18 h<sup>-</sup></i>                                                        | Lab stock  |
| KGY8097-2        | <i>its3-mNG:hphMX6 pik1-11:kanMX6 ade6-M210 leu1-32 ura4-D18 h<sup>-</sup></i>                                         | This study |
| <b>Figure 3</b>  |                                                                                                                        |            |
| KGY7438-2        | <i>pik1-D450-mNG:kanMX6 anp1-mCherry:ura4<sup>+</sup> ade6-M210 leu1-32 ura4-D18 h<sup>+</sup></i>                     | This study |
| KGY7589-2        | <i>pik1-D450-mNG:kanMX6 sec72-mCherry:ura4<sup>+</sup> ade6-M210 leu1-32 ura4-D18 h<sup>-</sup></i>                    | This study |
| KGY7953-2        | <i>GFP-P4C<sub>Sidc</sub>:leu1<sup>+</sup> sec72-mCherry:ura4<sup>+</sup> ade6-M210 leu1-32 ura4-D18 h<sup>+</sup></i> | This study |
| <b>Figure 4</b>  |                                                                                                                        |            |
| KGY2029-2        | <i>ncs1::kanMX6 ade6-M210 leu1-32 ura4-D18 h<sup>+</sup></i>                                                           | Lab stock  |
| KGY7919          | <i>pik1-D450-mNG:kanMX6 ncs1-mCherry:natMX6 ade6-M21X leu1-32 ura4-D18 h<sup>-</sup></i>                               | This study |
| KGY7589-2        | <i>pik1-D450-mNG:kanMX6 sec72-mCherry:ura4<sup>+</sup> ade6-M210 leu1-32 ura4-D18 h<sup>-</sup></i>                    | This study |
| KGY7926-2        | <i>pik1-D450-mNG:kanMX6 sec72-mCherry:ura4<sup>+</sup> ncs1::kanMX6 ade6-M210 leu1-32 ura4-D18 h<sup>-</sup></i>       | This study |
| KGY7461-2        | <i>pik1-D450-mNG:kanMX6 mCherry-cdc15 ade6-M21X leu1-32 ura4-D18 h<sup>-</sup></i>                                     | This study |
| KGY7955-2        | <i>GFP-P4C<sub>Sidc</sub>:leu1<sup>+</sup> ncs1::kanMX6 ade6-M210 leu1-32 ura4-D18 h<sup>+</sup></i>                   | This study |
| <b>Figure S1</b> |                                                                                                                        |            |
| KGY3223-2        | <i>syj1-mNG:hphMX6 ade6-M210 leu1-32 ura4-D18 h<sup>-</sup></i>                                                        | This study |
| KGY8066-2        | <i>syj1-mNG:hphMX6 pik1-11:kanMX6 ade6-M210 leu1-32 ura4-D18 h<sup>+</sup></i>                                         | This study |
| KGY3237-2        | <i>inp53-mNG:hphMX6 ade6-M210 leu1-32 ura4-D18 h<sup>-</sup></i>                                                       | This study |
| KGY8105-2        | <i>inp53-mNG:hphMX6 pik1-11:kanMX6 ade6-M210 leu1-32 ura4-D18 h<sup>2</sup></i>                                        | This study |
| KGY2302-2        | <i>lsb6::kanMX6 GFP-2xPH<sub>Plc</sub>:leu1<sup>+</sup> ade6-M210 leu1-32 ura4-D18 h<sup>-</sup></i>                   | This study |
| <b>Figure S2</b> |                                                                                                                        |            |

|                  |                                                                                                                             |            |
|------------------|-----------------------------------------------------------------------------------------------------------------------------|------------|
| KGY18195         | <i>lsb6::kanMX6 ade6-M210 leu1-32 ura4-D18 h<sup>+</sup></i>                                                                | Lab stock  |
| KGY7751-2        | <i>pik1-11:kanMX6 lsb6::kanMX6 ade6-M210 leu1-32 ura4-D18 h<sup>+</sup></i>                                                 | This study |
| KGY18661         | <i>GFP-stt4 ade6-704 leu1-32 h<sup>-</sup></i>                                                                              | Lab stock  |
| KGY7750-2        | <i>GFP-stt4 pik1-11:kanMX6 ade6-704 leu1-32 h<sup>+</sup></i>                                                               | This study |
| KGY2025-2        | <i>efr3::ura4<sup>+</sup> ade6-M210 leu1-32 ura4-D18 h<sup>-</sup></i>                                                      | Lab stock  |
| KGY4622-2        | <i>pik1-11:kanMX6 efr3::ura4<sup>+</sup> ade6-M210 leu1-32 ura4-D18 h<sup>+</sup></i>                                       | This study |
| KGY6369          | <i>its3-1 ade6-M21X leu1-32 ura4-D18 h<sup>-</sup></i>                                                                      | Lab stock  |
| KGY7749-2        | <i>pik1-11:kanMX6 its3-1 ade6-M210 leu1-32 ura4-D18 h<sup>+</sup></i>                                                       | This study |
| KGY18307         | <i>sac12::kanMX6 ade6-M210 leu1-32 ura4-D18 h<sup>+</sup></i>                                                               | Lab stock  |
| KGY7767-2        | <i>pik1-11:kanMX6 sac12::kanMX6 ade6-M21X leu1-32 ura4-D18 h<sup>-</sup></i>                                                | This study |
| KGY7925-2        | <i>pik1-D450-mNG:kanMX6 ncs1::kanMX6 ade6-M210 leu1-32 ura4-D18 h<sup>+</sup></i>                                           | This study |
| <b>Figure S3</b> |                                                                                                                             |            |
| KGY7890-2        | <i>cam2-mCherry:natMX6 pik1-D450-mNG:kanMX6 ade6-M21X leu1-32 ura4-D18 h<sup>-</sup></i>                                    | This study |
| KGY7890-2        | <i>myo1ΔIQ1ΔIQ2(unknown) cam2-mCherry:natMX6 pik1-D450-mNG:kanMX6 ade6-M21X leu1-32 ura4-D18 h<sup>-</sup></i>              | This study |
| KGY7764-2        | <i>sec72-mCherry:ura4<sup>+</sup> cam2-mNG:hphMX6 ade6-M21X leu1-32 ura4-D18 h<sup>+</sup></i>                              | This study |
| KGY5091-2        | <i>myo1ΔIQ1ΔIQ2(unknown) sec72-mCherry:ura4<sup>+</sup> cam2-mNeonGreen:hphMX6 ade6-M21X leu1-32 ura4-D18 h<sup>+</sup></i> | This study |
| KGY7949-2        | <i>YFP-cdc4:kanMX6 sec72-mCherry:ura4<sup>+</sup> ade6-M21X leu1-32 ura4-D18 h<sup>-</sup></i>                              | This study |
| KGY2547-2        | <i>cdc4-31 ade6-M21X leu1-32 ura4-D18 h<sup>-</sup></i>                                                                     | Lab stock  |
| KGY7978-2        | <i>cdc4-31 pik1-11:kanMX6 ade6-M21X leu1-32 ura4-D18 h<sup>-</sup></i>                                                      | This study |
